# Supplementary material for: Versatile grafting chemistry for creation of stable molecular layers on oxides
Source: Royal Society of Chemistry journal article supplement (doi:10.1039/c1jm13293h), 2011-11-14
Supplement: c1jm13293h.pdf [file c1jm13293h.pdf]

## Supporting Information

### Versatile grafting chemistry for creation of stable molecular layers on oxides

Peerasak Paoprasert<sup>a,ψ</sup>, Srikanth Kandala,<sup>b</sup> Daniel P. Sweat<sup>a</sup>, Rose Ruther,<sup>a</sup> and Padma Gopalan<sup>a, b\*</sup>

1. <sup>a</sup>Department of Chemistry, University of Wisconsin, Madison, WI, USA 53706

2. <sup>b</sup>Department of Materials Science and Engineering, University of Wisconsin, Madison, WI, USA 53706

#### Calculations of surface coverage of the molecular layers on SiO<sub>2</sub> and TiO<sub>2</sub> by XPS

The overall number of the atoms of interest (X) per unit area of TiO<sub>2</sub>, for example, can be calculated from the using:

$$N(X) = \frac{A(X)s(Ti)\rho(Ti, TiO_2)\sin(\theta)\exp\left(\frac{t}{\lambda(X, organic)\sin(\theta)}\right)}{A(Ti)s(X)\rho(Ti, TiO_2)\sin(\theta)\exp\left(\frac{t}{\lambda(Ti, organic)\sin(\theta)}\right)}$$

where  $N(X)$  is number of atoms per unit area,  $A(X)/A(Ti)$  is the ratio of integrated XPS peak areas,  $s(Ti)/s(X)$  is sensitivity factor ratio between titanium and atom of interest,  $\rho(Ti, TiO_2)$  is number of Ti atoms per unit volume in  $TiO_2$ ,  $\lambda(Ti, TiO_2)$  is inelastic mean free path (IMFP) of Ti photoelectrons in  $TiO_2$ ,  $t$  is thickness of the layer,  $\lambda(X, organic)$  and  $\lambda(Ti, organic)$  are IMFPs of X and Ti in organic films, respectively.<sup>1</sup> The angle  $\theta$  is the take-off angle of photoelectrons with respect to the sample plane ( $\theta = 45^\circ$ ). Neglecting the surface roughness<sup>2</sup> and using similar approximation of IMFPs of organic self-assembled monolayers from previous studies [ $\lambda(A^\circ) =$

$9.0 + 0.022 \cdot E(\text{eV})]$  where  $E(\text{eV})$  is the kinetic energy in electron volts,<sup>3</sup>  $\lambda(\text{X, organic}) \sim 2.8\text{-}3.5$  nm and  $\lambda(\text{Ti, TiO}_2) \sim \lambda(\text{Ti 2p, organic}) = 3.3$  nm. Since  $\lambda(\text{X, organic}) \sim \lambda(\text{Ti 2s, organic})$  and  $t <$

$\lambda$  for thin organic layer approximation, we conclude that  $\frac{\exp(\frac{t}{\lambda(\text{X, organic})\sin(\theta)})}{\exp(\frac{t}{\lambda(\text{Ti, organic})\sin(\theta)})} \approx 1$ . Using

$\rho(\text{Ti, TiO}_2) = 2.6 \cdot 10^{22}$  atoms/cm<sup>3</sup>,  $s(\text{N 1s}) = 0.477$ ,  $s(\text{Cl 2p}) = 0.891$ , and  $s(\text{Re 4f}) = 3.961$ , the surface coverage of bipyridine and rhenium-bipyridine complex on TiO<sub>2</sub> was calculated. For the calculation of surface coverage of organic layers on SiO<sub>2</sub>,  $\rho(\text{Si, SiO}_2) = 5.0 \times 10^{22}$  atoms/cm<sup>3</sup> and  $s(\text{Si 2s}) = 0.399$  were used.

### **Synthesis of ReOH**

**ReOH** was synthesized using the literature procedure.<sup>4</sup> To a 50-mL round bottom flask, **BipyOH** (0.24 g, 1.3 mmol),  $\text{Re}(\text{CO})_5\text{Cl}$  (0.47 g, 1.3 mmol), and methanol (20 mL) were added. The reaction mixture was heated at 60 °C overnight. After cooling down to room temperature, the mixture was precipitated in hexane and then filtered and washed with cold hexane and cold methanol to yield the **ReOH** (0.48 g, 75%). <sup>1</sup>H NMR (300 MHz, DMSO-d<sub>6</sub>,  $\delta$  in ppm): 8.99 (d,  $J=5$  Hz, 2H), 8.93 (d,  $J=9$  Hz, 1H), 8.70 (d,  $J=8$  Hz, 1H), 8.61 (s, 1H), 8.31 (dt,  $J=1, 8$  Hz, 1H), 7.74 (dt,  $J=1, 8$  Hz, 1H), 7.69 (d,  $J=6$  Hz, 1H), 5.81 (t,  $J=6$  Hz, 1H, -OH), 4.74 (d,  $J=6$  Hz, 2H, -CH<sub>2</sub>-). <sup>13</sup>C NMR (75 MHz, DMSO-d<sub>6</sub>,  $\delta$  in ppm): 197.8, 190.1, 156.8, 155.2, 154.7, 152.9, 152.6, 140.3, 127.8, 124.8, 124.1, 121.2, 61.4.

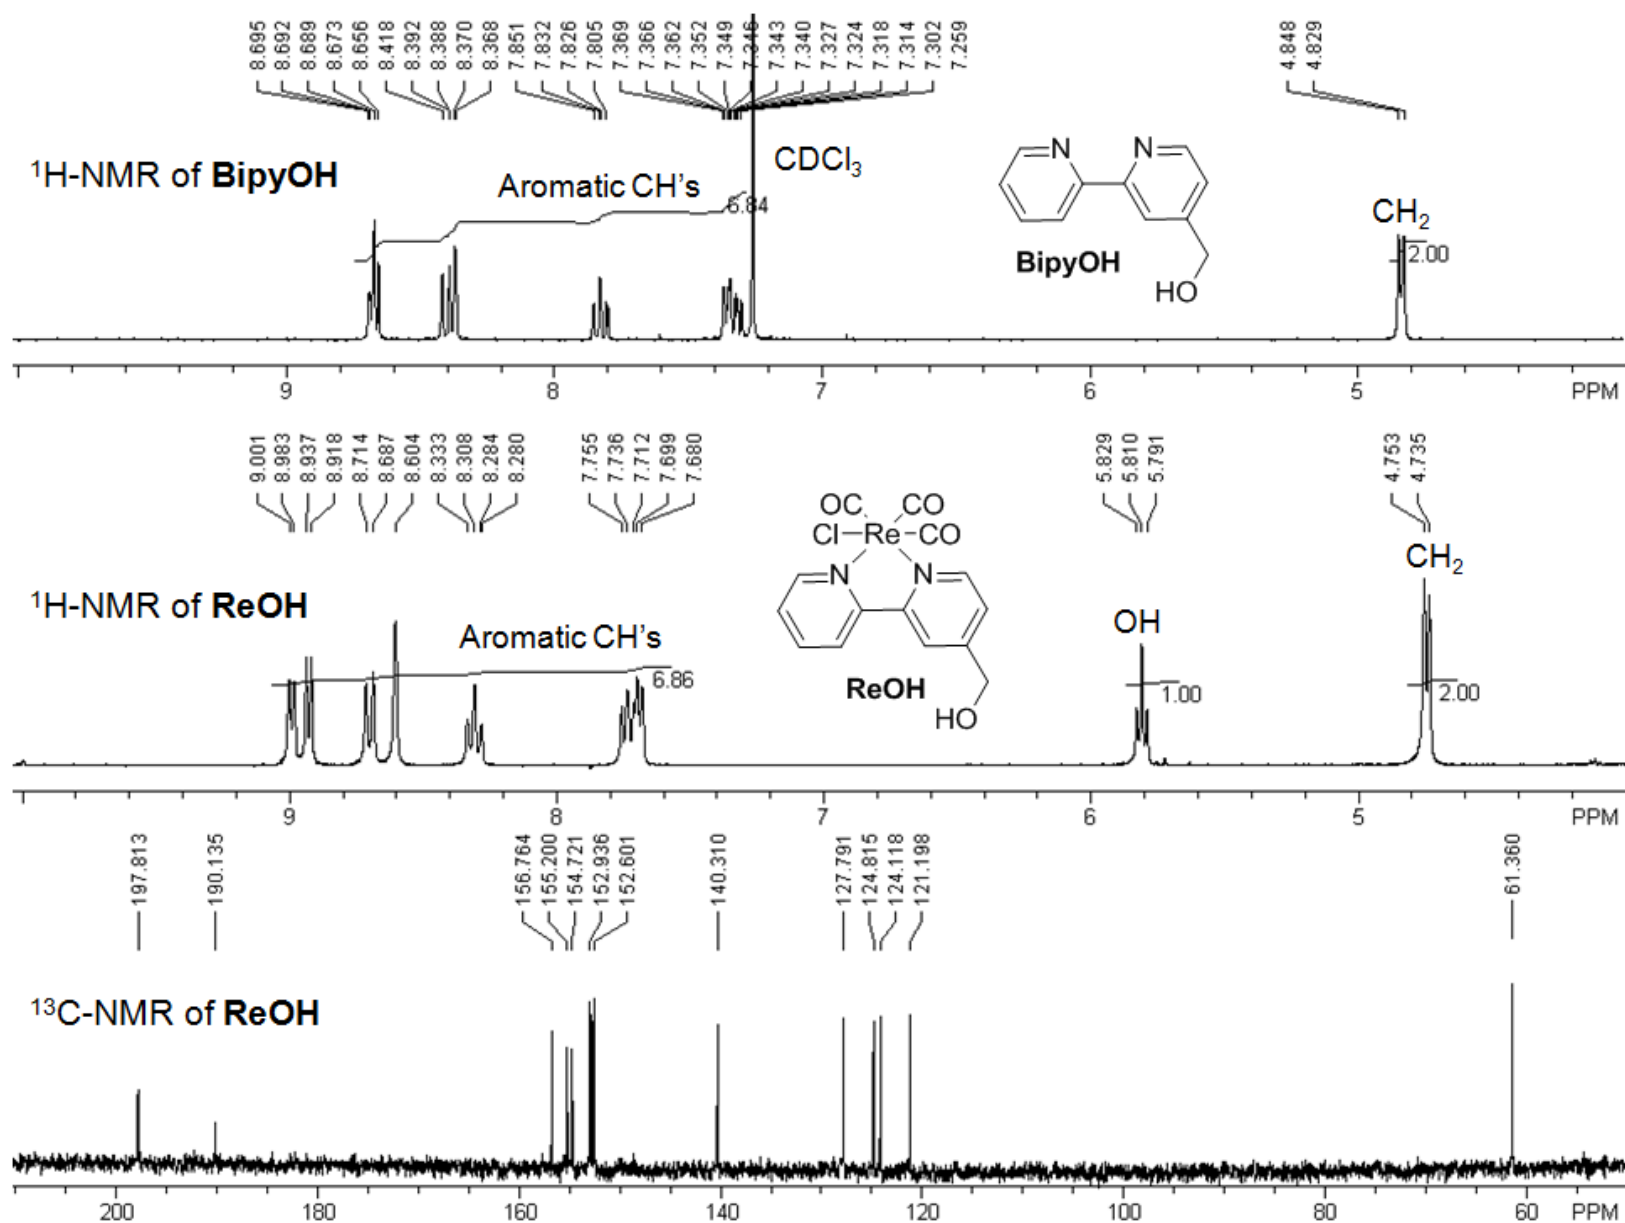

### IRRAS spectrum of spin-cast film of ReOH on SiO<sub>2</sub>

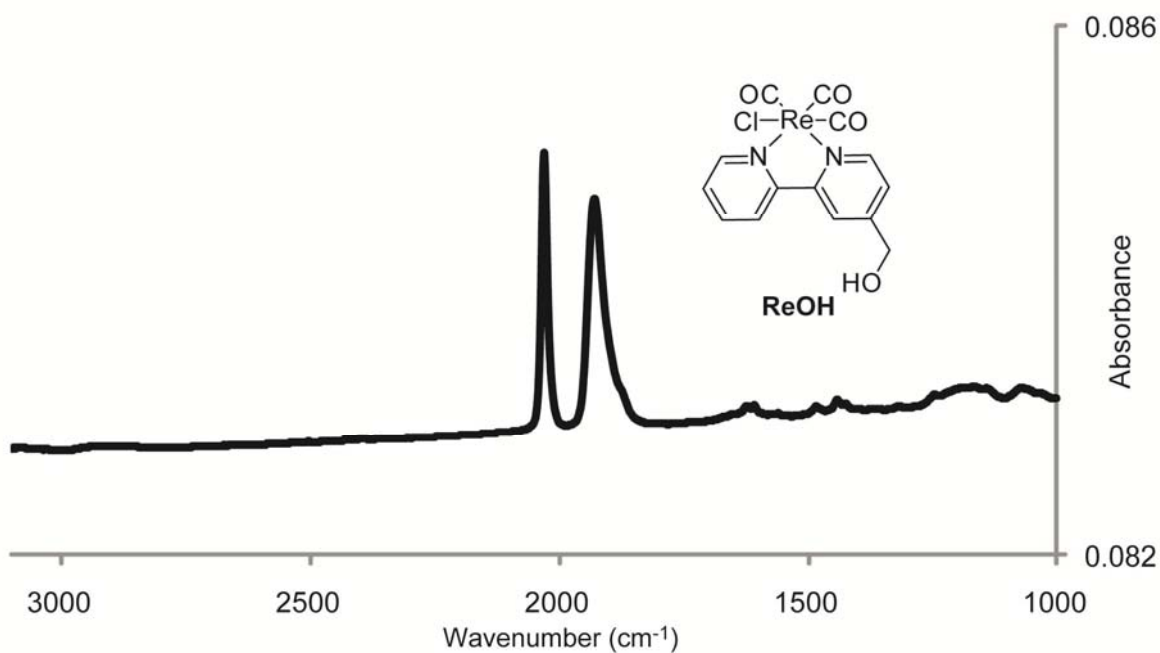

### IRRAS spectrum of the grafted layer of rhenium-bipyridine complex (BipyOH-Re) on TiO<sub>2</sub>

The IRRAS spectrum of grafted rhenium-bipyridine complex (**BipyOH-Re**) on TiO<sub>2</sub> is similar to that on SiO<sub>2</sub>. Three C≡O stretching bands, one at 2024 cm<sup>-1</sup> corresponding to the symmetric stretching mode of metal carbonyl groups and two overlapping asymmetric stretching bands at 1905 cm<sup>-1</sup> were observed indicating the presence of rhenium-bipyridine complex on TiO<sub>2</sub> surface.

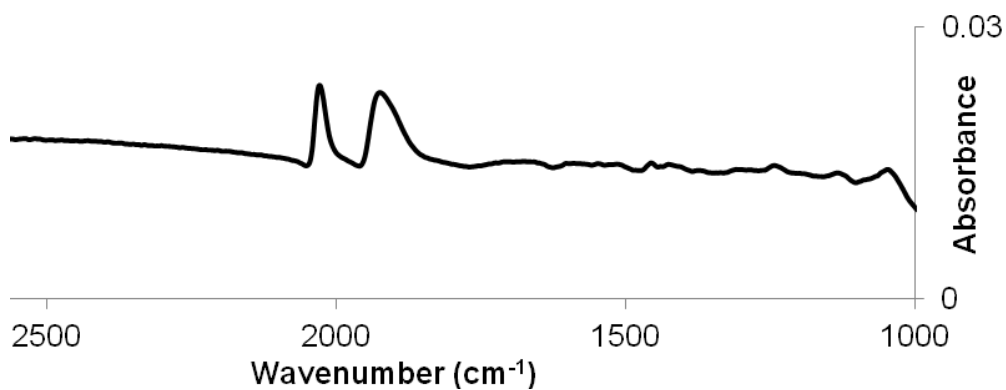

**NMR spectra of Bipy(OH)<sub>2</sub>:** before and after heating at 160°C for 48 h showing no change in the spectrum. This rules out self-condensation or degradation upon thermal annealing on the substrate to form multilayers. Hence, the higher surface coverage of Bipy(OH)<sub>2</sub> is primarily due to bidentate anchoring to the substrate via ether bond formation.

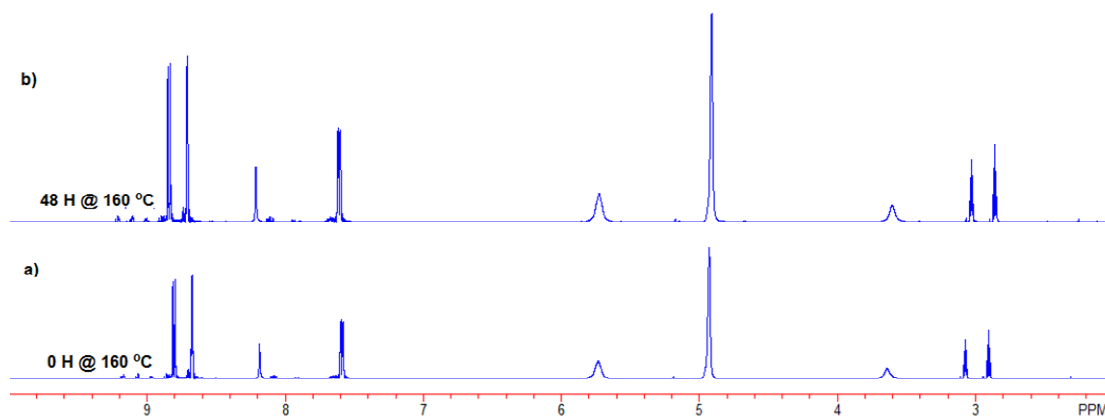

### Reference:

- (1) Kim, H., P. E. Colavita, P. Paoprasert, P. Gopalan, T. F. Kuech and R. J. Hamers *Surf. Sci.* **2008**, *602*, 2382.
- (2) Franking, R. A.; Landis, E. C.; Hamers, R. J. *Langmuir* **2009**, *25*, 10676.

- (3) Laibinis, P. E., C. D. Bain and G. M. Whitesides *J. Phys. Chem.* **1991**, *95*, 7017.
- (4) Paoprasert, P.; Laaser, J. E.; Xiong, W.; Franking, R. A.; Hamers, R. J.; Zanni, M. T.; Schmidt, J. R.; Gopalan, P. *J. Phys. Chem. C* **2010**, *114*, 9898.
